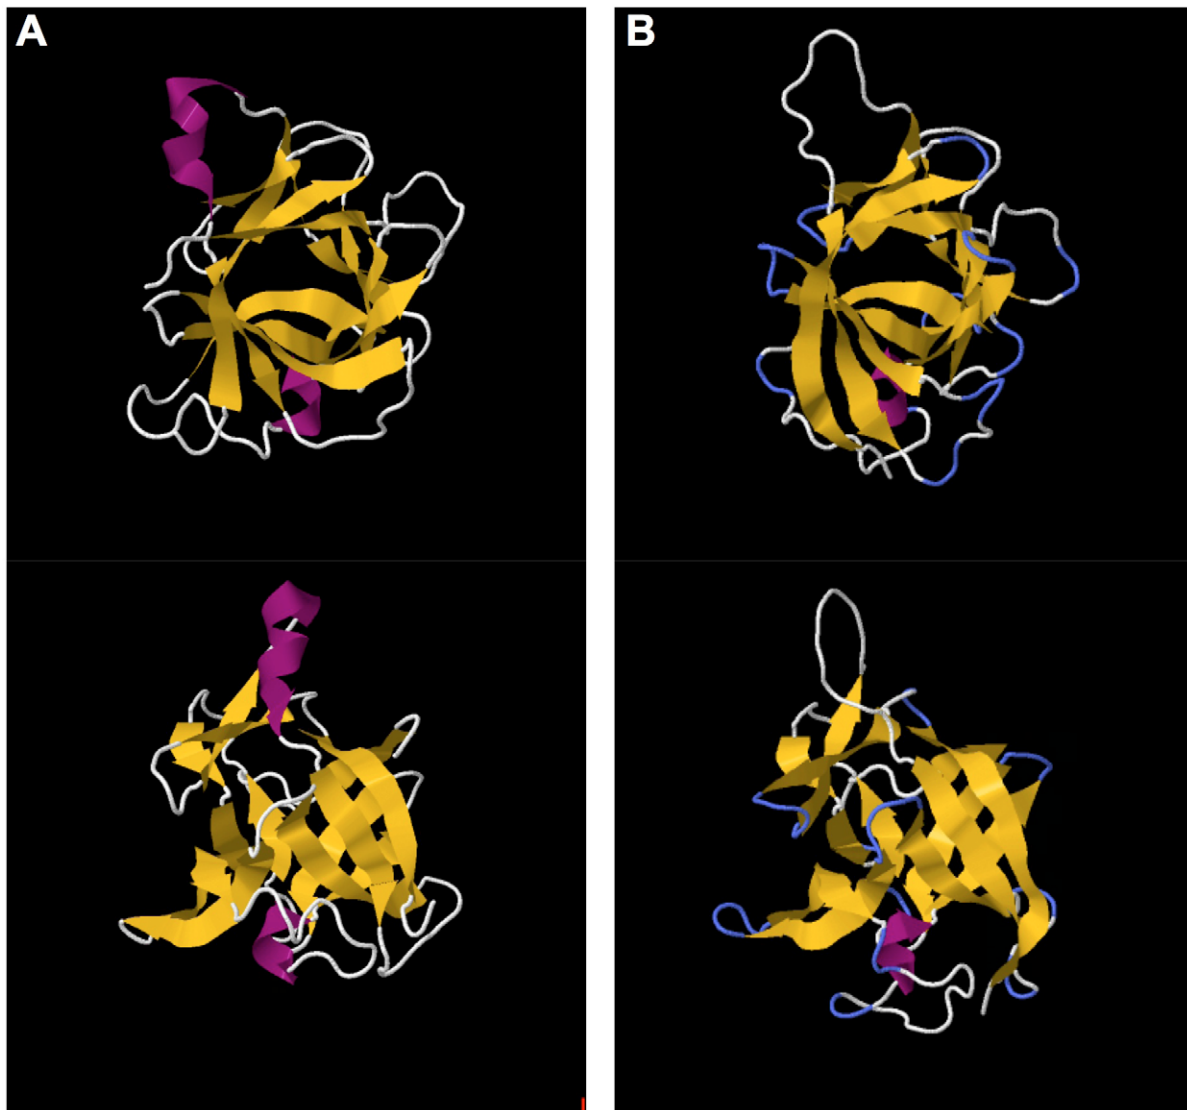

**Supplementary material Fig. 1. Mature human and zebrafish IL-1 $\beta$  share significant structural similarity.** Structural prediction of zebrafish IL-1 $\beta$  cleaved at residue D148 using the Phyre prediction server reveals a beta-trefoil structure (B) highly similar to that of human mature IL-1 $\beta$  (A).

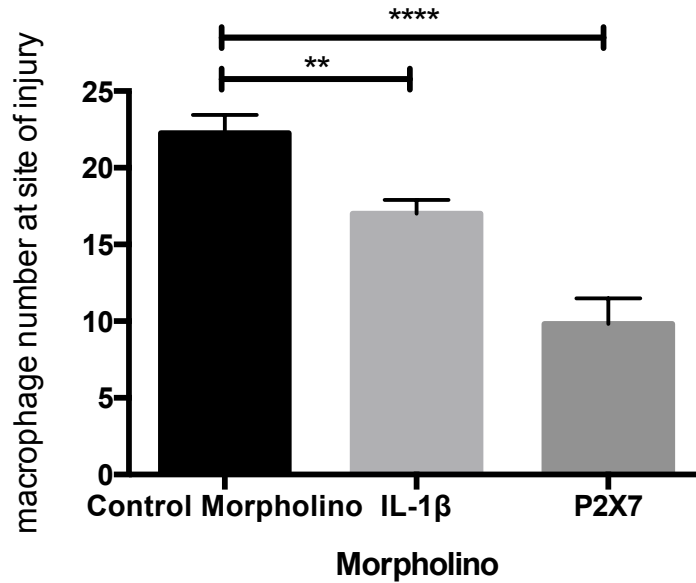

**Supplementary material Fig. 2. Macrophage recruitment to injury is inhibited by IL-1 $\beta$  and P2X7 knockdown.**

*mpeg:Gal4;UAS:Kaede* embryos injected with IL-1 $\beta$  morpholino and P2X7 morpholino injured at 48hpf show reduced numbers of macrophages at the site of injury at 6hpi. \*\* $P \leq 0.01$  and \*\*\*\* $P \leq 0.0001$  by one way ANOVA with Dunnett's post test.  $n=30$  performed as 3 independent experiments.

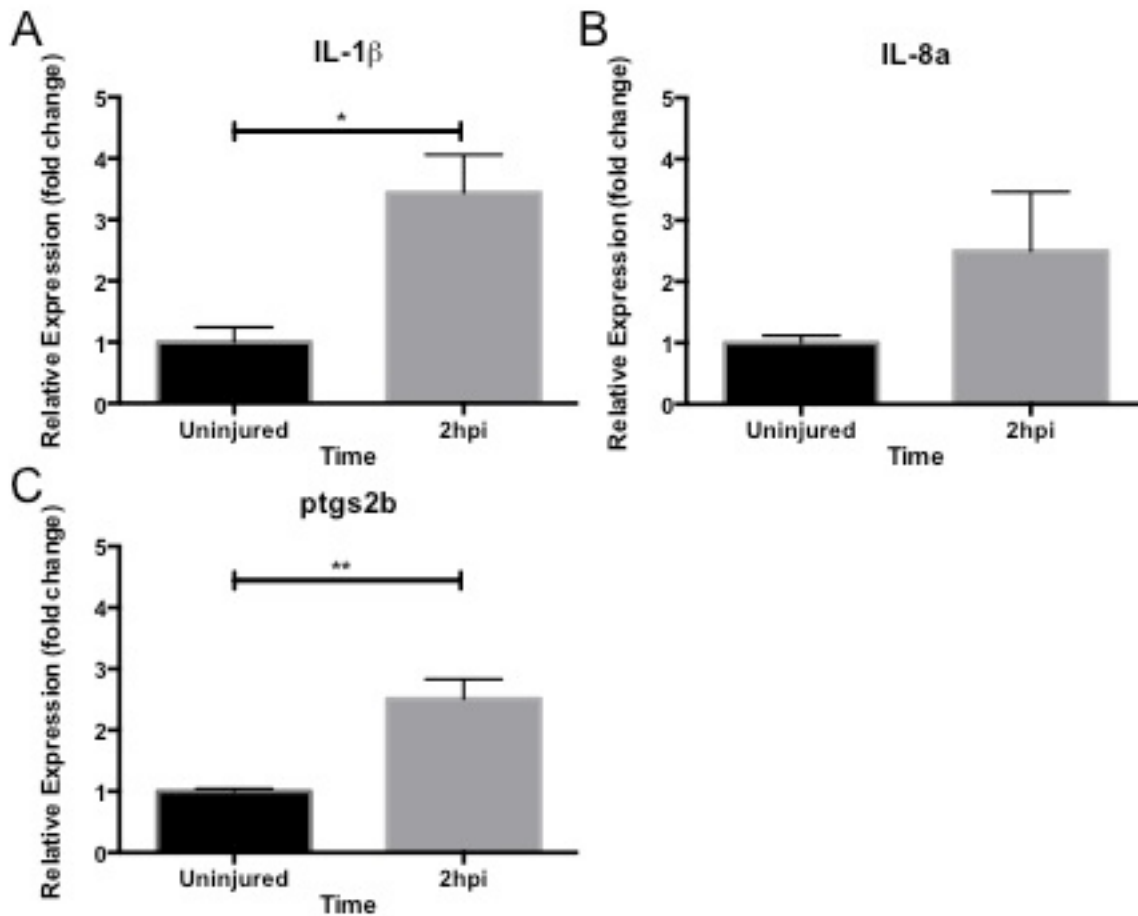

**Supplementary material Fig. 3. IL-1 $\beta$  is highly expressed in zebrafish leukocytes.** A-C. Zebrafish IL-1 $\beta$ , IL-8a and ptgs2b are induced in response to injury at 2hpi as shown by de Oliveira et al. (2013). \* $P \leq 0.05$  and \*\* $P \leq 0.01$  by unpaired *t*-test of triplicate samples of  $\geq 3$  independent experiments.
